# Supplementary material
Source: publisher site journal article supplement (https://www.dovepress.com/article/377762)
Supplement: Supplementary file 1 [file get_supplementary_file.php]

**Supplementary Material**

**Supplementary Table 1** Summaries of non-linear HRV indices derived from Poincare plots in female staff stratified by night shift work

| **Variables** | **Total** | **No shift** | **Shift** | ***P*** |
| --- | --- | --- | --- | --- |
| **SD1_24h (ms)** | 25.91(12.78) | 22.87(11.88) | 26.46(13.28) | **0.033** |
| **SD2_24h (ms)** | 214.60(58.38) | 194.97(58.45) | 218.76(56.98) | **0.002** |
| **SD1/SD2_24h** | 0.12(0.04) | 0.12(0.04) | 0.12(0.05) | 0.718 |

Notes:SD1, minor axis of the cloud; SD2, major axis of the cloud. Data are expressed as median (IQR). Mann Whitney Wilcoxon test was performed. *P* < 0.05 was regarded as statistically significant, as indicated by bold.

**Supplementary Table 2** The comparison of the three circadian patterns parameters (M, A, θ) of heart rate and SD1 between the two female groups stratified by night shift work

|  | **MESOR** | |  | **Amplitude** | |  | **Acrophase, h** | |  |
| --- | --- | --- | --- | --- | --- | --- | --- | --- | --- |
|  | **No shift** | **Shift** | ***P*** | **No shift** | **Shift** | ***P*** | **No shift** | **Shift** | ***P*** |
| **Heart rate** | 76.26(8.73) | 75.94(10.01) | 0.212 | 11.62(4.94) | 12.25(6.56) | 0.168 | 14.14(2.21) | 14.47(2.25) | 0.137 |
| **SD1** | 21.48(11.90) | 25.25(13.20) | **0.020** | 5.38(4.93) | 8.33(8.32) | **0.003** | 3.33(4.05) | 3.33(2.43) | 0.529 |

**Notes:** SD1, minor axis of the cloud. Data are expressed as median (IQR). Mann Whitney Wilcoxon test was performed. *P* < 0.05 was regarded as statistically significant, as indicated by bold.

**Supplementary Table 3** Association of the severities of mental stress, mood, sleep status and the circadian patterns parameters (M, A, θ) of heart rate and SD1 in night-shift female workers based on a liner regression model a, respectively

|  |  | **Heart rate** | | **SD1** | |  | **Heart rate** | | **SD1** | |
| --- | --- | --- | --- | --- | --- | --- | --- | --- | --- | --- |
|  |  | **β** | ***P*** | **β** | ***P*** |  | **β** | ***P*** | **β** | ***P*** |
| **PSS** | **Log M** | -0.01 | **0.032** | 0.05 | **0.044** | **ESS** | 0.00 | 0.569 | -0.02 | 0.367 |
|  | **Log A** | -0.01 | 0.645 | 0.05 | 0.296 |  | -0.01 | 0.700 | -0.02 | 0.727 |
|  | **Log θ** | 0.00 | 0.845 | -0.03 | 0.545 |  | 0.02 | 0.052# | 0.02 | 0.773 |
| **DASS-D** | **Log M** | -0.01 | 0.235 | 0.01 | 0.53 | **FAS** | -0.00 | 0.784 | 0.01 | 0.809 |
|  | **Log A** | -0.00 | 0.894 | 0.02 | 0.68 |  | 0.04 | 0.239 | 0.10 | 0.120 |
|  | **Log θ** | -0.01 | 0.366 | -0.04 | 0.532 |  | 0.02 | 0.174 | -0.02 | 0.839 |
| **DASS-A** | **Log M** | 0.00 | 0.874 | 0.01 | 0.766 | **Sleep quality** | 0.00 | 0.662 | 0.00 | 0.849 |
|  | **Log A** | 0.00 | 0.951 | 0.02 | 0.624 |  | -0.03 | 0.314 | 0.02 | 0.665 |
|  | **Log θ** | 0.01 | 0.446 | 0.06 | 0.333 |  | -0.01 | 0.124 | -0.04 | 0.460 |
| **DASS-S** | **Log M** | -0.01 | 0.110 | 0.04 | 0.130 | **Sleep bouts** | 0.00 | 0.270 | 0.00 | 0.785 |
|  | **Log A** | -0.01 | 0.735 | 0.06 | 0.239 |  | 0.00 | 0.132 | 0.00 | 0.994 |
|  | **Log θ** | 0.02 | 0.134 | 0.05 | 0.494 |  | 0.00 | 0.547 | 0.01 | 0.412 |

**Notes:** BMI, body mass index; PSS, perceived stress scale; DASS-D, depression, anxiety and stress scale-depression; DASS-A, depression, anxiety and stress scale-anxiety; DASS-S, depression, anxiety and stress scale-stress; ESS, excessive sleep scale; FAS, fatigue scale; Log, logarithm (Log 10); Ref, reference.

a Covariables included age, BMI, coffee, alcohol, smoke and each separate categorical variable.

PSS < 30 (Ref) vs PSS ≥ 30; DASSD ≤ 9 (Ref) vs DASSD > 9; DASSA ≤ 6 (Ref) vs DASSA > 6; DASSS ≤ 10 (Ref) vs DASSS >10; ESS ≤ 10 (Ref) vs ESS > 10; FAS ≤ 21 (Ref) vs FAS > 21; Sleep quality ≤ 2 (Ref) vs Sleep quality > 2.

*P* < 0.05 was regarded as statistically significant, indicated by bold; *P* < 0.10 was regarded as suggestive, indicated by #.

**Supplementary Table 4** Combined effects of 24-h averages of LF, HF and the LF/HF ratio on the circadian patterns parameters (M, A, θ) of heart rate and SD1 in night-shift female workers based on a liner regression model b

|  |  | **Heart rate** | | **SD1** | |
| --- | --- | --- | --- | --- | --- |
|  |  | **βs** | ***P*** | **βs** | ***P*** |
| **LF_24h** | **Log M** | -0.52 | **0.002** | 0.85 | **0.000** |
|  | **Log A** | -0.34 | 0.056# | 0.28 | 0.145 |
|  | **Log θ** | -0.23 | 0.206 | 0.08 | 0.695 |
| **HF_24h** | **Log M** | 0.19 | 0.275 | -0.50 | **0.006** |
|  | **Log A** | 0.28 | 0.128 | -0.10 | 0.613 |
|  | **Log θ** | 0.18 | 0.348 | -0.03 | 0.905 |
| **LF/HF_24h** | **Log M** | -0.00 | 0.991 | -0.33 | **0.000** |
|  | **Log A** | 0.02 | 0.764 | -0.31 | **0.000** |
|  | **Log θ** | 0.04 | 0.598 | -0.03 | 0.733 |

**Notes:** M, MESOR; A, amplitude; θ, acrophrase time; HRV, heart rate variability; LF, low frequency power; HF, high frequency power; Log, logarithm (Log 10).

b Covariables included age, BMI, coffee, alcohol and smoke, 24-haverages of LF, HF and LF/HF ratio.

βs represented standardized coefficients.

*P* < 0.05 was regarded as statistically significant, indicated by bold; *P* < 0.10 was regarded as suggestive, indicated by #.
